# Supplementary material for: Charged Amino Acids Contribute to ZorO Toxicity
Source: MDPI journal article supplement (doi:10.3390/toxins15010032), 2022-12-31
Supplement: s1 [file toxins-2127780-supplementary.pdf › toxins-2127780-supplementary.pdf]

**Table S1.** Bacterial strains and plasmids used in this study.

| Strain or plasmid                 | Relevant characteristics                                                      | Source     | Primers          |
|-----------------------------------|-------------------------------------------------------------------------------|------------|------------------|
| <u>Bacterial strains</u>          |                                                                               |            |                  |
| <i>E. coli</i> MG1655             | <i>E. coli</i> F <sup>-</sup> <i>ilvG</i> <i>rfb</i> -50 <i>rph</i> -1        | Lab stock  |                  |
| <i>E. coli</i> Top10              | Cloning vector                                                                | Lab stock  |                  |
| UTK007                            | DJ480 PCP- <i>araE</i>                                                        | [1]        |                  |
| UTK102                            | UTK007- <i>lepB</i> -SPA                                                      | [2]        |                  |
| MG- $\Delta$ 28-FLAG- <i>zorO</i> | MG1655 recombineered with P <sub>zorO</sub> - $\Delta$ 28UTR-FLAG <i>zorO</i> | [2]        |                  |
| MG- <i>zorO</i> - <i>orzO</i>     | MG1655 recombineered with <i>zorO</i> - <i>orzO</i>                           | This study | EF1864A, EF1865A |
| <u>Plasmids</u> pAZ3              |                                                                               |            |                  |
|                                   | Cm(R), P <sub>BAD</sub> promoter                                              | [3]        |                  |
| pAZ3-FLAG- <i>zorO</i>            | Cm(R)                                                                         | [2]        |                  |
| pAZ3- <i>zorO</i> -D2N            | Cm(R)                                                                         | This study | EF1576 EF1577    |
| pAZ3- <i>zorO</i> -D2K            | Cm(R)                                                                         | This study | EF1574, EF 1575  |
| pAZ3- <i>zorO</i> -K7Q            | Cm(R)                                                                         | This study | EF1580, EF1581   |
| pAZ3- <i>zorO</i> -K7E            | Cm(R)                                                                         | This study | EF1578, EF1579   |
| pAZ3- <i>zorO</i> -E16Q           | Cm(R)                                                                         | This study | EF1184, EF1185   |
| pAZ3- <i>zorO</i> -E16R           | Cm(R)                                                                         | This study | EF1215, EF1216   |
| pAZ3- <i>zorO</i> -R23L           | Cm(R)                                                                         | This study | EF1186, EF1187   |
| pAZ3- <i>zorO</i> -R23E           | Cm(R)                                                                         | This study | EF1217, EF1218   |

**Table S1.** Continued.

| Strain or plasmid                  | Relevant characteristics | Source     | Primers                        |
|------------------------------------|--------------------------|------------|--------------------------------|
| pAZ3- <i>zorO</i> -D26N            | Cm(R)                    | This study | EF1311, EF1312                 |
| pAZ3- <i>zorO</i> -D26K            | Cm(R)                    | This study | EF1309, EF1310                 |
| pAZ3- <i>zorO</i> -K29Q            | Cm(R)                    | This study | EF1315, EF1316                 |
| pAZ3- <i>zorO</i> -K29E            | Cm(R)                    | This study | EF1313, EF1314                 |
| pBR322                             | Amp(R), Tet(R)           | [4]        |                                |
| pBR- <i>zor</i> - <i>orz</i>       | Amp(R)                   | [2]        |                                |
| pBR- <i>zorO</i> - <i>orzO</i>     | Amp(R)                   | This study | EF1835, EF1836, EF1837, EF1838 |
| pBR- <i>zorO</i> -R23L <i>orzO</i> | Amp(R)                   | This study | EF1186, EF1187                 |
| pBR-plac- <i>orzO</i>              | Amp(R)                   | [1]        |                                |
| pBR- <i>zorO</i>                   | Amp(R)                   | [2]        |                                |
| pBR- $\Delta$ 28-FLAG <i>zorO</i>  | Amp(R)                   | This study | EF1836, EF1839, EF1837, EF1840 |

**Table S2.** Oligonucleotides used in this study.

| Name   | Oligonucleotide sequence, 5'→3'                      |
|--------|------------------------------------------------------|
| EF1184 | GCTCATTGCCGTACTGCAGTTATTAGTGGCTCTG                   |
| EF1185 | CAGAGCCACTAATAACTGCAGTACGGCAATGAGC                   |
| EF1186 | GTTATTAGTGGCTCTGTTACTGTTGATTGATTTGTTGAAG             |
| EF1187 | CTTCAACAAATCAATCAACAGTAACAGAGCCACTAATAAC             |
| EF1215 | CGTGCTCATTGCCGTACTGCGGTTATTAGTGGCTCTGTTACG           |
| EF1216 | CGTAACAGAGCCACTAATAACCGCAGTACGGCAATGAGCAGC           |
| EF1217 | GAGTTATTAGTGGCTCTGTTAGAGTTGATTGATTTGTTGAAGTAAC       |
| EF1218 | GTTACTTCAACAAATCAATCAACTCTAACAGAGCCACTAATAACTC       |
| EF1309 | GTGGCTCTGTTACGGTTGATTAAGTTGTTGAAGTAACGGGCAAATTG      |
| EF1310 | CAATTTGCCCGTTACTTCAACAACCTTAATCAACCGTAACAGAGCCAC     |
| EF1311 | GTGGCTCTGTTACGGTTGATTAATTTGTTGAAGTAACGGGCAAATTG      |
| EF1312 | CAATTTGCCCGTTACTTCAACAACCTTAATCAACCGTAACAGAGCCAC     |
| EF1313 | CTGTTACGGTTGATTGATTTGTTGGAGTAACGGGCAAATTGAAACGCATC   |
| EF1314 | GATGCGTTTCAATTTGCCCGTTACTCCAACAACCTTAATCAACCGTAACAG  |
| EF1315 | CTGTTACGGTTGATTGATTTGTTGCAGTAACGGGCAAATTGAAACGCATC   |
| EF1316 | GATGCGTTTCAATTTGCCCGTTACTGCAACAACCTTAATCAACCGTAACAG  |
| EF1574 | GATTATAAAGATGATGATGATAAAAAGACGCTGACACAAAAGTTAACCGTG  |
| EF1575 | CACGGTTAACTTTTGTGTCAGCGTCTTTTATCATCATCATCTTTATAATC   |
| EF1576 | GATTATAAAGATGATGATGATAAAAACACGCTGACACAAAAGTTAACCGTG  |
| EF1577 | CACGGTTAACTTTTGTGTCAGCGTGTCTTTTATCATCATCATCTTTATAATC |
| EF1578 | GATGATAAAGACACGCTGACACAAGAGTTAACCGTGCTCATTGCCGTACTG  |
| EF1579 | CAGTACGGCAATGAGCACGGTTAACTCTTGTGTCAGCGTGTCTTTATCATC  |
| EF1580 | GATGATAAAGACACGCTGACACAACAGTTAACCGTGCTCATTGCCGTACTG  |

**Table S2.** (continued).

| Name    | Oligonucleotide sequence, 5'→3'                                        |
|---------|------------------------------------------------------------------------|
| EF1581  | CAGTACGGCAATGAGCACGGTTAACTGTTGTGTCAGCGTGTCTTTATCATC                    |
| EF1835  | CATCGTCATCCTCGGCACCGTCCATCGATTTTATATTCAACGC                            |
| EF1836  | GTCCCTGATGGTCGTCATCTACGGATCCCCCTTAGATGCG                               |
| EF1837  | CGCATCTAAGGGGGGATCCGTAGATGACGACCATCAGGGAC                              |
| EF1838  | GCGTTGAATATAAAAATCGATGGACGGTGCCGAGGATGACGATG                           |
| EF1839  | GCGCTCATCGTCATCCTCGGCACCGTCCGAATAAATTATAACCATATCC                      |
| EF1840  | GGATATGGTTATAATTTATTCGGACGGTGCCGAGGATGACGATGAGCGC                      |
| EF1856  | GTAGATGACGACCATCAGGGACCATATGAATATCCTCCTTAG                             |
| EF1857  | CGAGCGATCCTTGAAGCTGTGTAGGCTGGAGCTGCTTCG                                |
| EF1858  | CGAAGCAGCTCCAGCCTACACAGCTTCAAGGATCGCTCG                                |
| EF1859  | CTAAGGAGGATATTCATATGGTCCCTGATGGTCGTCATCTAC                             |
| EF1864A | CTCTAAATAATTCAAATTGGTCCGATCCGGCGCAACGTCCCCATCGATTTTAT<br>ATTCAACGCACC  |
| EF1865A | CATCCCTGAAATGTATTAATGAAATAAACGATATTTTACGCGCGTGTAGGCT<br>GGAGCTGCTTCG   |
| EF1869B | CTCTAAATAATTCAAATTGGTCCGATCCGGCGCAACGTCCCCATCGTCATCCT<br>CGGCACCGGATCC |

**Table S3.** Point mutants of the charged amino acid residues of ZorO and their respective GRAVY index.

| Amino acid | Position | Mutated to | Symbol | GRAVY index [5] |
|------------|----------|------------|--------|-----------------|
| Wild type  |          |            | ZorO   | 1.40            |
| Aspartate  | 2        | Asparagine | D2N    | 1.39            |
|            |          | Lysine     | D2K    | 1.38            |
| Lysine     | 7        | Glutamine  | K7Q    | 1.41            |
|            |          | Glutamate  | K7E    | 1.40            |
| Glutamate  | 16       | Arginine   | E16R   | 1.36            |
|            |          | Glutamine  | E16Q   | 1.40            |
| Arginine   | 23       | Leucine    | R23L   | 1.68            |
|            |          | Glutamate  | R23E   | 1.43            |
| Aspartate  | 26       | Asparagine | D26N   | 1.40            |
|            |          | Lysine     | D26K   | 1.38            |
| Lysine     | 29       | Glutamine  | K29Q   | 1.41            |
|            |          | Glutamate  | K29E   | 1.41            |

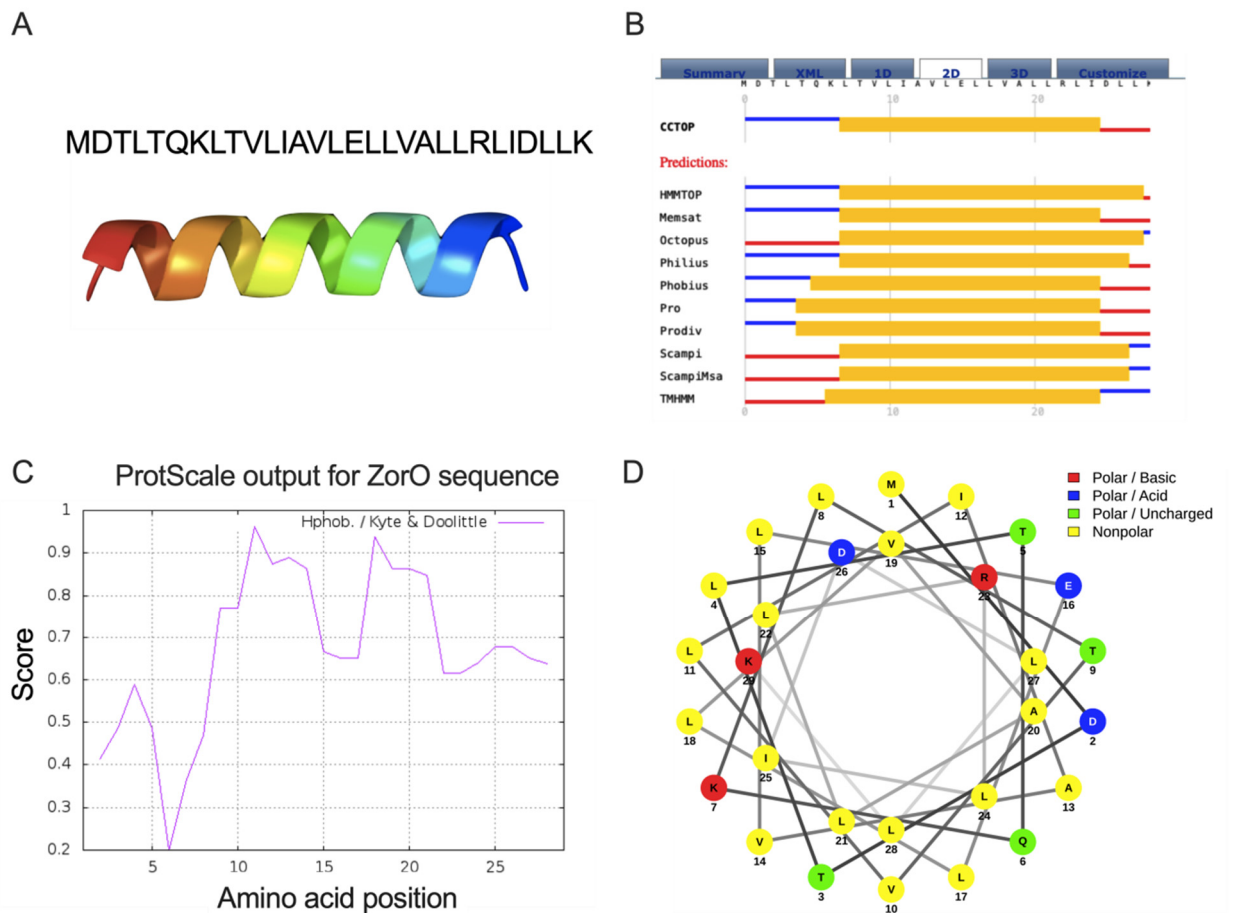

**Figure S1.** Structure and hydropathy prediction of ZorO. Alpha-helical structure of ZorO predicted by Phyre 2.0 (A). Predicted transmembrane domain and orientation (B); Blue line at N-terminus indicates N-terminus towards the periplasm, yellow bar represents the predicted transmembrane domain. The ProtScale value based on hydropobicity scale of ZorO sequence (C). Helical wheel projection of ZorO (D).

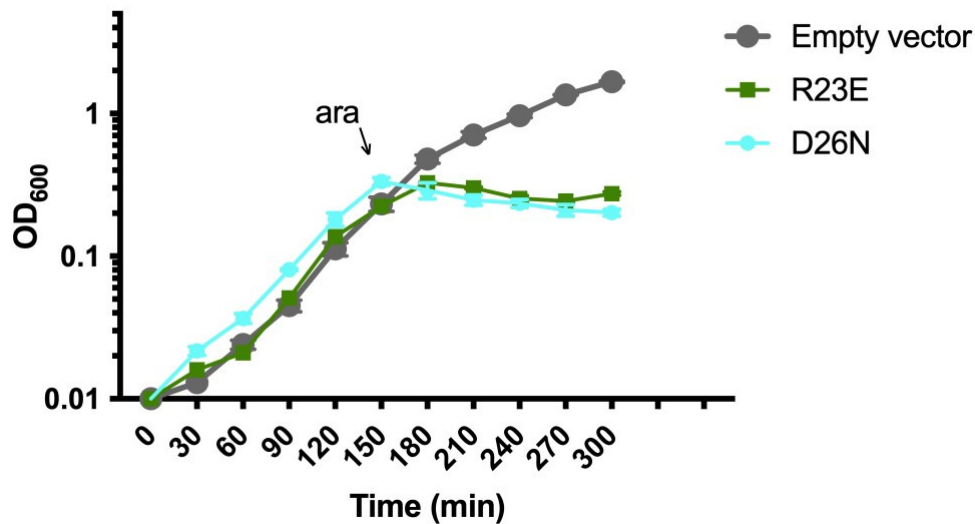

**Figure S2.** Growth curve of *E. coli* UTK007 cells carrying indicated pAZ3 plasmid vector. Cells were grown in LB medium until mid-log phase and induced by arabinose (6.66  $\mu$ M for R23E and 66.6  $\mu$ M for D26N)  $n=3$ , shown are mean  $\pm$  standard deviation. .

## References

1. Wen, J.; Won, D.; Fozo, E. M. The ZorO-OrzO type I toxin-antitoxin locus: repression by the OrzO antitoxin. *Nucleic Acids Res.* **2014**, *42*, 1930–1946, doi:10.1093/nar/gkt1018.
2. Bogati, B.; Wadsworth, N.; Barrera, F.; Fozo, E. M. Improved growth of *Escherichia coli* in aminoglycoside antibiotics by the *zor-orz* toxin-antitoxin system. *J. Bacteriol.* **2021**, JB0040721, doi:10.1128/JB.00407-21.
3. Kawano, M.; Aravind, L.; Storz, G. An antisense RNA controls synthesis of an SOS-induced toxin evolved from an antitoxin. *Mol. Microbiol.* **2007**, *64*, 738–754, doi:10.1111/j.13652958.2007.05688.x.
4. Bolivar, F.; Rodriguez, R. L.; Greene, P. J.; Betlach, M. C.; Heyneker, H. L.; Boyer, H. W.; Crosa, J. H.; Falkow, S. Construction and characterization of new cloning vehicles. II. A multipurpose cloning system. *Gene* **1977**, *2*, 95–113, doi:10.1016/0378-1119(77)90000-2.
5. Kyte, J.; Doolittle, R. F. A simple method for displaying the hydropathic character of a protein. *J. Mol. Biol.* **1982**, *157*, 105–132, doi:10.1016/0022-2836(82)90515-0.
